# Supplementary material
Source: PubMed Central journal article supplement (PMC3080528)
Supplement: 101435_1.pdf [file 101435_1.pdf]

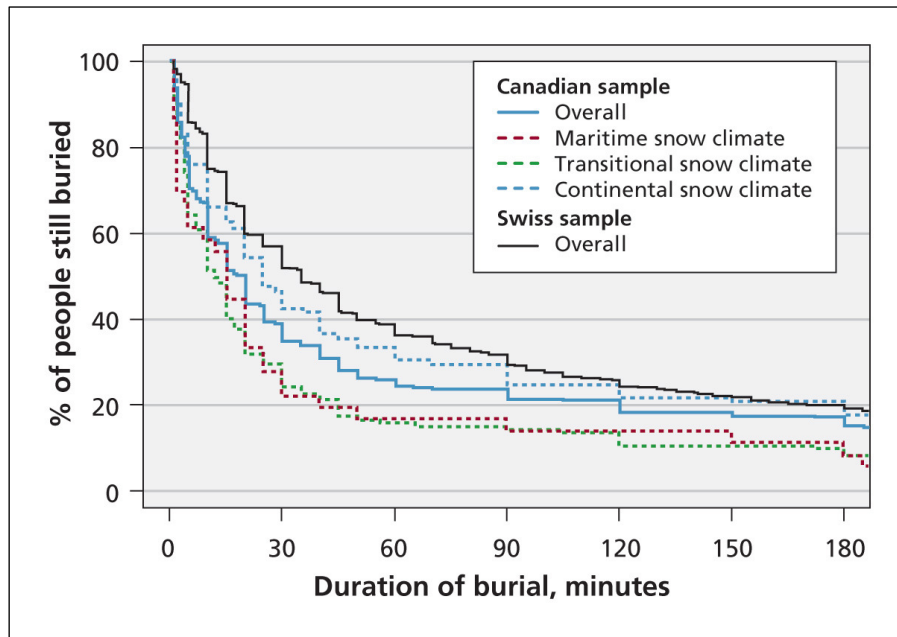

**Appendix 1:** Proportion of people still buried by duration of burial in Canada ( $n = 301$ ) and Switzerland ( $n = 946$ ). Dotted lines show Canadian subsets by snow climate (maritime,  $n = 36$ ; transitional,  $n = 132$ ; and continental,  $n = 101$ ). [See Box 2 in the main article for brief descriptions of the snow climates.]
