# Supplementary material
Source: PubMed Central journal article supplement (PMC3080528)
Supplement: 101435_2.pdf [file 101435_2.pdf]

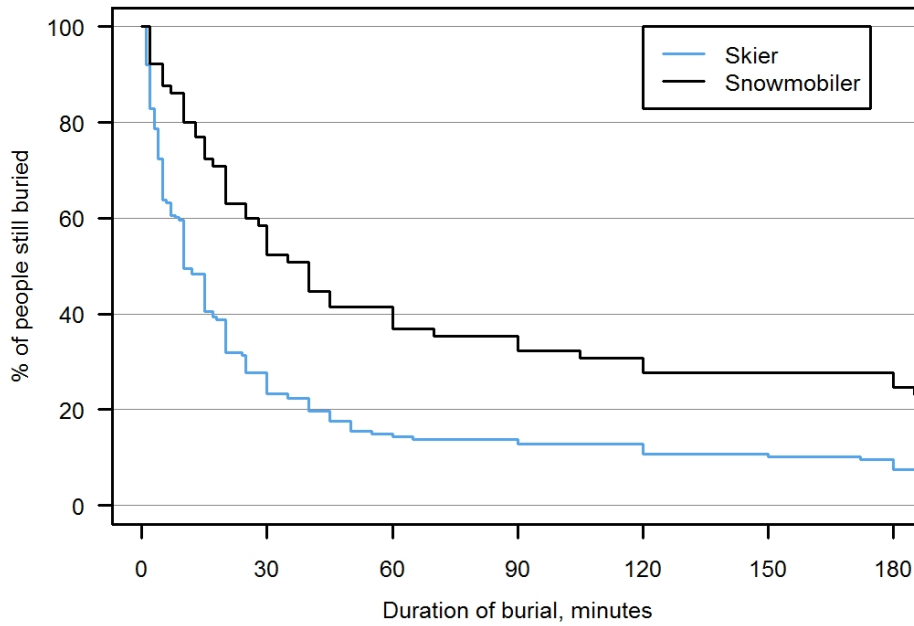

**Appendix 2** (as supplied by the authors): Proportion of people still buried, by duration of avalanche burial, among all skiers ( $n = 188$ ) and snowmobilers ( $n = 65$ ) in Canada.
