# Supplementary material
Source: PubMed Central journal article supplement (PMC3080528)
Supplement: 101435_3.pdf [file 101435_3.pdf]

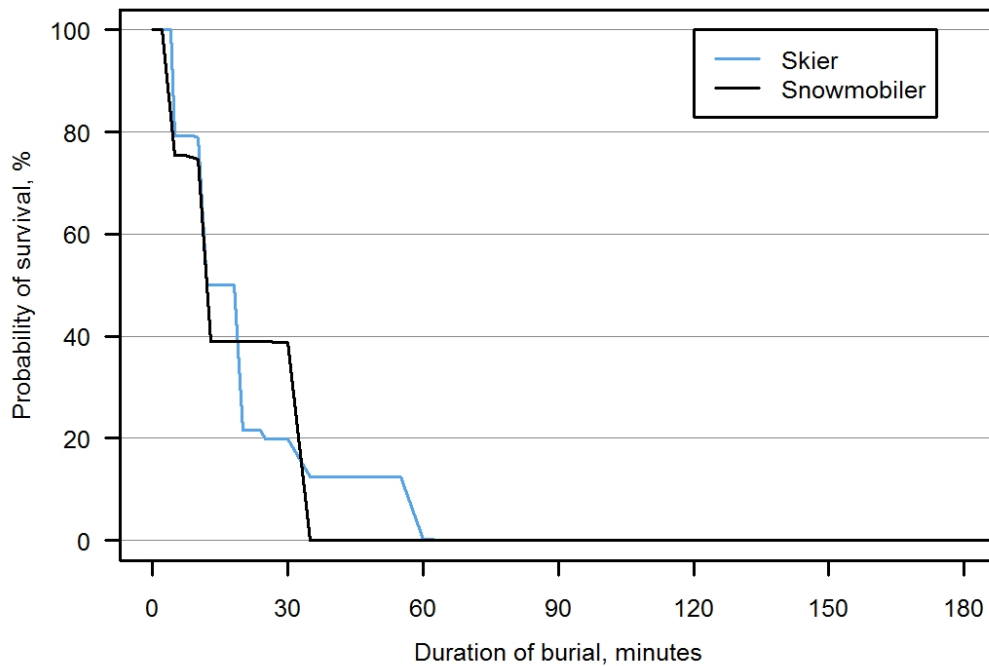

**Appendix 3** (as supplied by the authors): Survival curves for all skiers ( $n = 188$ ) and snowmobilers ( $n = 65$ ) completely buried in avalanches in Canada from Oct. 1, 1980, to Sept. 30, 2005, by duration of burial (Dümbgen comparison:  $p = 0.7$ ).
